# Supplementary material for: Increasing Incidence of Geomyces destructans Fungus in Bats from the Czech Republic and Slovakia
Source: PubMed Central journal article supplement (PMC2974652; doi:10.1371/journal.pone.0013853), 2010-11-05
Supplement: pone.0013853.s001.pdf [file pone.0013853.s001.pdf]

**Supporting Information for:** Increasing Incidence of *Geomyces destructans* Fungus in Bats from the Czech Republic and Slovakia

Natália Martínková\*, Peter Bačkor, Tomáš Bartonička, Pavla Blažková, Jaroslav Červený, Lukáš Falteisek, Jiří Gaisler, Vladimír Hanzal, Daniel Horáček, Zdeněk Hubálek, Helena Jahelková, Miroslav Kolařík, Ľuboš Korytár, Alena Kubátová, Blanka Lehotská, Roman Lehotský, Radek K. Lučan, Ondřej Májek, Jan Matějů, Zdeněk Řehák, Jiří Šafář, Přemysl Tájek, Emil Tkadlec, Marcel Uhrin, Josef Wagner, Dita Weinfurtová, Jan Zima, Jan Zukal, Ivan Horáček

\* Corresponding Author E-mail: martinkova@ivb.cz

**Table S1.** Material examined for *Geomyces destructans* presence found in the Czech Republic and Slovakia, host species, localities, direct microscopic examination, sequence Accession Numbers, and isolate numbers.

| Number            | Host species                                      | Locality                        | Geographic coordinates | Collection date | Direct microscopy | Accession Number                   | Cultivation     |
|-------------------|---------------------------------------------------|---------------------------------|------------------------|-----------------|-------------------|------------------------------------|-----------------|
| 1 <sup>t</sup>    | <i>Myotis myotis</i>                              | Pod Medved'ou skalou, Modra, SK | 48.3748, 17.3          | 5.3.2010        | neg.              | neg.                               | neg.            |
| 2 <sup>t</sup>    | <i>M. myotis</i>                                  | Pod Medved'ou skalou, Modra, SK | 48.3748, 17.3          | 5.3.2010        | neg.              | neg.                               | neg.            |
| SK10 <sup>c</sup> | <i>M. myotis</i>                                  | Banská Štiavnica, mines, SK     | 48.47, 18.9            | 3.3.2010        | n/a               | n/a                                | neg.            |
| SK9 <sup>c</sup>  | <i>M. myotis</i>                                  | Banská Štiavnica, mines, SK     | 48.47, 18.9            | 3.3.2010        | n/a               | n/a                                | neg.            |
| SK1 <sup>c</sup>  | <i>M. myotis</i>                                  | Dubník Mines, SK                | 48.9, 21.45            | 1.3.2010        | n/a               | n/a                                | neg.            |
| SK2 <sup>c</sup>  | <i>M. myotis</i>                                  | Dubník Mines, SK                | 48.9, 21.45            | 1.3.2010        | n/a               | n/a                                | neg.            |
| SK3 <sup>c</sup>  | <i>M. myotis</i>                                  | Dubník Mines, SK                | 48.9, 21.45            | 1.3.2010        | n/a               | n/a                                | neg.            |
| SK4 <sup>c</sup>  | <i>M. myotis</i>                                  | Dubník Mines, SK                | 48.9, 21.45            | 1.3.2010        | n/a               | n/a                                | neg.            |
| SK5 <sup>c</sup>  | <i>M. blythii</i>                                 | Dubník Mines, SK                | 48.9, 21.45            | 1.3.2010        | n/a               | n/a                                | neg.            |
| SK6 <sup>c</sup>  | <i>M. myotis</i><br><i>M. blythii</i> + <i>M.</i> | Dubník Mines, SK                | 48.9, 21.45            | 2.3.2010        | n/a               | HM584979<br>(uncultured<br>fungus) | CCM8378<br>neg. |
| SK7 <sup>c</sup>  | <i>dasychneme</i>                                 | Dubník Mines, SK                | 48.9, 21.45            | 2.3.2010        | n/a               | n/a                                | neg.            |
| SK8 <sup>c</sup>  | <i>M. daubentonii</i>                             | Dubník Mines, SK                | 48.9, 21.45            | 2.3.2010        | n/a               | n/a                                | neg.            |
| 6 <sup>t</sup>    | <i>M. myotis</i>                                  | Nová Drátenická Cave, CZ        | 49.2912, 16.7279       | 6.3.2010        | <i>G.d.</i>       | HM584948                           | n/a             |
| 7 <sup>t</sup>    | <i>M. myotis</i>                                  | Nová Drátenická Cave, CZ        | 49.2912, 16.7279       | 6.3.2010        | neg.              | neg.                               | n/a             |
| 5 <sup>t</sup>    | <i>M. myotis</i>                                  | Stará Drátenická Cave, CZ       | 49.2912, 16.728        | 6.3.2010        | <i>G.d.</i>       | neg.                               | n/a             |
| 10 <sup>t</sup>   | <i>M. myotis</i>                                  | Byčí skála Cave, CZ             | 49.3084, 16.6923       | 6.3.2010        | <i>G.d.</i>       | neg.                               | n/a             |
| 11 <sup>t</sup>   | <i>M. myotis</i>                                  | Byčí skála Cave, CZ             | 49.3084, 16.6923       | 6.3.2010        | <i>G.d.</i>       | HM584950                           | n/a             |
| 20 <sup>t</sup>   | <i>M. dasychneme</i>                              | Byčí skála Cave, CZ             | 49.3084, 16.6923       | 6.3.2010        | neg.              | neg.                               | n/a             |
| 8 <sup>t</sup>    | <i>M. myotis</i>                                  | Jestřábka Cave, CZ              | 49.3087, 16.6744       | 6.3.2010        | <i>G.d.</i>       | HM584949                           | n/a             |
| 9 <sup>t</sup>    | <i>M. myotis</i>                                  | Jestřábka Cave, CZ              | 49.3087, 16.6744       | 6.3.2010        | <i>G.d.</i>       | (Collembola)                       | neg.            |

|                     |                                 |                                         |                  |           |             |                 |             |
|---------------------|---------------------------------|-----------------------------------------|------------------|-----------|-------------|-----------------|-------------|
| 21 <sup>c</sup>     | <i>M. myotis</i>                | Diana Mine, Dolní Loučky, CZ            | 49.3558, 16.3505 | 21.3.2010 | n/a         | n/a             | <i>G.d.</i> |
| 22 <sup>c</sup>     | <i>M. myotis</i>                | Diana Mine, Dolní Loučky, CZ            | 49.3558, 16.3505 | 21.3.2010 | n/a         | n/a             | <i>G.d.</i> |
| 15 <sup>t</sup>     | <i>M. myotis</i>                | Králova Cave, CZ                        | 49.3591, 16.4153 | 18.3.2010 | neg.        | (Nematoda)      | neg.        |
| 16 <sup>t</sup>     | <i>M. myotis</i>                | Králova Cave, CZ                        | 49.3591, 16.4153 | 18.3.2010 | <i>G.d.</i> | neg.            | neg.        |
| 17 <sup>t</sup>     | <i>M. myotis</i>                | Králova Cave, CZ                        | 49.3591, 16.4153 | 18.3.2010 | <i>G.d.</i> | (Basidiomycota) | neg.        |
| 18 <sup>t</sup>     | <i>M. myotis</i>                | Králova Cave, CZ                        | 49.3591, 16.4153 | 18.3.2010 | <i>G.d.</i> | neg.            | n/a         |
| 19 <sup>t</sup>     | <i>M. myotis</i>                | Králova Cave, CZ                        | 49.3591, 16.4153 | 18.3.2010 | <i>G.d.</i> | HM584952        | n/a         |
| 12 <sup>t</sup>     | <i>M. myotis</i>                | Kateřinská Cave, CZ                     | 49.3611, 16.7095 | 18.3.2010 | <i>G.d.</i> | neg.            | neg.        |
| 13 <sup>t</sup>     | <i>M. myotis</i>                | Kateřinská Cave, CZ                     | 49.3611, 16.7095 | 18.3.2010 | neg.        | (Nematoda)      | neg.        |
| 14 <sup>t</sup>     | <i>M. myotis</i>                | Kateřinská Cave, CZ                     | 49.3611, 16.7095 | 18.3.2010 | <i>G.d.</i> | HM584951        | neg.        |
| GD28 <sup>c</sup>   | <i>M. myotis</i>                | Černá řeka Mine, CZ                     | 49.4196, 12.7352 | 7.3.2009  | n/a         | (Basidiomycota) | n/a         |
| N1 <sup>n</sup>     | <i>M. myotis</i>                | Solenice, CZ                            | 49.6148, 14.1946 | 5.3.2010  | <i>G.d.</i> | HM584954        | CCF3938     |
| N2 <sup>n</sup>     | <i>M. myotis</i>                | Solenice, CZ                            | 49.6148, 14.1946 | 5.3.2010  | <i>G.d.</i> | HM584955        | CCF3939     |
|                     | <i>Rhinolophus hipposideros</i> |                                         |                  |           |             |                 |             |
| N21 <sup>n,t</sup>  | (dead)                          | Javoříčske Caves, CZ                    | 49.6694, 16.9131 | 25.3.2010 | <i>G.d.</i> | n/a             | neg.        |
|                     |                                 | Panny Marie Sněžné Mine, Hrubá voda, CZ |                  |           |             |                 |             |
| 23 <sup>c</sup>     | <i>M. myotis</i>                | Panny Marie Sněžné Mine, Hrubá voda, CZ | 49.6713, 17.4173 | 19.3.2010 | n/a         | n/a             | neg.        |
| 24 <sup>c</sup>     | <i>M. myotis</i>                | Velká Střelná, Libavá, CZ               | 49.6713, 17.4173 | 19.3.2010 | n/a         | n/a             | neg.        |
| 25 <sup>c</sup>     | <i>M. myotis</i>                | Velká Střelná, Libavá, CZ               | 49.7, 17.53      | 19.3.2010 | n/a         | n/a             | <i>G.d.</i> |
| 26 <sup>c</sup>     | <i>M. myotis</i>                | Velká Střelná, Libavá, CZ               | 49.7, 17.53      | 19.3.2010 | n/a         | n/a             | <i>G.d.</i> |
| 27 <sup>c</sup>     | <i>M. myotis</i>                | Velká Střelná, Libavá, CZ               | 49.7, 17.53      | 19.3.2010 | n/a         | n/a             | neg.        |
| GD19 <sup>c</sup>   | <i>M. myotis</i>                | Sv. Jan na poušti Mine, CZ              | 49.7396, 12.966  | 21.3.2010 | n/a         | HM584966        | n/a         |
| N15 <sup>n</sup>    | <i>M. myotis</i>                | Sv. Jan na poušti Mine, CZ              | 49.7396, 12.966  | 26.2.2010 | <i>G.d.</i> | HM584957        | CCF3943     |
| GD7 <sup>c</sup>    | <i>M. myotis</i>                | Sv. Anna Mine, Výškov, CZ               | 49.7491, 13.0026 | 23.2.2010 | n/a         | HM584960        | n/a         |
| N8 <sup>n</sup>     | <i>M. myotis</i>                | Líšnice, mine, CZ                       | 49.7607, 16.8629 | 16.3.2010 | <i>G.d.</i> | n/a             | neg.        |
| N19 <sup>hair</sup> | shed hair                       | Nový Knín, CZ                           | 49.7892, 14.2945 | 17.3.2010 | neg.        | n/a             | neg.        |
| N16 <sup>n</sup>    | <i>R. hipposideros</i>          | Nový Knín, CZ                           | 49.7892, 14.2945 | 17.3.2010 | neg.        | n/a             | neg.        |
| N17 <sup>n</sup>    | <i>M. myotis</i>                | Nový Knín, CZ                           | 49.7892, 14.2945 | 17.3.2010 | <i>G.d.</i> | HM584958        | CCF3944     |
| N18 <sup>n</sup>    | <i>M. myotis</i>                | Nový Knín, CZ                           | 49.7892, 14.2945 | 17.3.2010 | neg.        | n/a             | neg.        |
| GD35 <sup>c</sup>   | <i>M. myotis</i>                | Český Šternberk, CZ                     | 49.8097, 14.9266 |           | n/a         | HM584978        | n/a         |
| GD8 <sup>c</sup>    | <i>M. myotis</i>                | Trdlina, mine, CZ                       | 49.8832, 12.8133 | 14.2.2010 | n/a         | (Ascomycota)    | n/a         |
| GD30 <sup>c</sup>   | <i>M. myotis</i>                | Věra Mine, CZ                           | 49.9159, 12.7767 | 16.3.2010 | n/a         | HM584973        | n/a         |

|                   |                       |                                         |                  |           |             |                     |             |
|-------------------|-----------------------|-----------------------------------------|------------------|-----------|-------------|---------------------|-------------|
| GD9 <sup>c</sup>  | <i>M. bechsteinii</i> | Lazurový vrch, mine near castle, CZ     | 49.9164, 12.7772 | 5.3.2010  | n/a         | HM584961            | n/a         |
| GD31 <sup>c</sup> | <i>M. myotis</i>      | Liblín, house cellar, CZ                | 49.9171, 13.5395 | 14.3.2010 | n/a         | HM584974            | n/a         |
| GD29 <sup>c</sup> | <i>M. myotis</i>      | Jeskyně Inků Mine, CZ                   | 49.9174, 12.7676 | 26.3.2010 | n/a         | HM584971            | n/a         |
| GD6 <sup>c</sup>  | <i>M. myotis</i>      | Pístov, house cellar, CZ                | 49.9229, 12.7653 | 18.2.2010 | n/a         | neg.                | n/a         |
| GD1 <sup>c</sup>  | <i>M. myotis</i>      | Malá Amerika Mines, CZ                  | 49.9566, 14.1901 | 22.2.2010 | n/a         | HM584959            | n/a         |
| GD32 <sup>c</sup> | <i>M. myotis</i>      | Malá Amerika Mines, CZ                  | 49.9566, 14.1901 | 22.2.2010 | n/a         | HM584975            | n/a         |
| N0 <sup>n</sup>   | <i>M. myotis</i>      | Malá Amerika Mines, CZ                  | 49.9566, 14.1901 | 2.2.2010  | n/a         | HM584953            | CCF3937     |
| N10 <sup>n</sup>  | <i>M. myotis</i>      | Malá Amerika Mines, CZ                  | 49.9566, 14.1901 | 16.3.2010 | <i>G.d.</i> | n/a                 | neg.        |
| N12 <sup>n</sup>  | <i>M. myotis</i>      | Malá Amerika Mines, CZ                  | 49.9566, 14.1901 | 16.3.2010 | <i>G.d.</i> | HM584956            | CCF3941     |
| N11 <sup>t</sup>  | <i>M. myotis</i>      | Malá Amerika Mines, CZ                  | 49.9566, 14.1901 | 16.3.2010 | <i>G.d.</i> | n/a                 | neg.        |
| N13 <sup>t</sup>  | <i>M. myotis</i>      | Malá Amerika Mines, CZ                  | 49.9566, 14.1901 | 16.3.2010 | <i>G.d.</i> | n/a                 | CCF3942     |
| GD26 <sup>c</sup> | <i>M. myotis</i>      | Nečtiny, house cellar, CZ               | 49.9609, 13.1615 | 12.3.2010 | n/a         | HM584971            | n/a         |
|                   | <i>Barbastella</i>    |                                         |                  |           |             |                     |             |
| GD27 <sup>c</sup> | <i>barbastellus</i>   | Nečtiny, house cellar, CZ               | 49.9609, 13.1615 | 12.3.2010 | n/a         | neg.                | n/a         |
| 34 <sup>c</sup>   | <i>M. myotis</i>      | Franz Mine, Moravice, CZ                | 49.9774, 17.2829 | 6.3.2010  | n/a         | n/a                 | CCM8380     |
| 35 <sup>c</sup>   | <i>M. myotis</i>      | Franz Mine, Moravice, CZ                | 49.9774, 17.2829 | 6.3.2010  | n/a         | n/a                 | <i>G.d.</i> |
| 32 <sup>c</sup>   | <i>M. myotis</i>      | Mařka Mine, Bohdíkov, CZ                | 50.0215, 16.8911 | 9.3.2010  | n/a         | n/a                 | neg.        |
| 33 <sup>c</sup>   | <i>M. myotis</i>      | Mařka Mine, Bohdíkov, CZ                | 50.0215, 16.8911 | 9.3.2010  | n/a         | n/a                 | neg.        |
| GD20 <sup>c</sup> | <i>M. myotis</i>      | Manganka, CZ                            | 50.055, 12.716   | 10.3.2010 | n/a         | HM584967            | n/a         |
| GD21 <sup>c</sup> | <i>M. myotis</i>      | Manganka, CZ                            | 50.055, 12.716   | 10.3.2010 | n/a         | HM584968            | n/a         |
| GD22 <sup>c</sup> | <i>M. nattereri</i>   | Manganka, CZ                            | 50.055, 12.716   | 10.3.2010 | n/a         | HM584969            | n/a         |
| GD24 <sup>c</sup> | <i>M. myotis</i>      | Staré Sedlo, Hrušková, mine, CZ         | 50.1679, 12.7098 | 18.3.2010 | n/a         | neg.                | n/a         |
| 28 <sup>c</sup>   | <i>M. myotis</i>      | Rejvíz, mine I a II, CZ                 | 50.219, 17.3247  | 20.3.2010 | n/a         | n/a                 | neg.        |
| 29 <sup>c</sup>   | <i>M. myotis</i>      | Rejvíz, mine I a II, CZ                 | 50.219, 17.3247  | 20.3.2010 | n/a         | n/a                 | <i>G.d.</i> |
| 30 <sup>c</sup>   | <i>M. myotis</i>      | Rejvíz, mine I a II, CZ                 | 50.219, 17.3247  | 20.3.2010 | n/a         | n/a                 | CCM8379     |
|                   |                       | Jeskyně na Špičáku Cave, Supíkovice, CZ |                  |           |             |                     |             |
| 31 <sup>c</sup>   | <i>M. myotis</i>      | CZ                                      | 50.2833, 17.25   | 18.3.2010 | n/a         | n/a                 | neg.        |
| GD3 <sup>c</sup>  | <i>M. myotis</i>      | Dolní Studenec, CZ                      | 50.3, 12.53      | 24.2.2010 | n/a         | neg.                | n/a         |
|                   |                       |                                         |                  |           |             | (uncultured fungus) |             |
| GD2 <sup>c</sup>  | <i>M. myotis</i>      | Nejdek, CZ                              | 50.32, 12.73     | 23.2.2010 | n/a         |                     | n/a         |
| GD23 <sup>c</sup> | <i>M. myotis</i>      | Červená štola (Pernink), CZ             | 50.3568, 12.7979 | 7.3.2010  | n/a         | HM584970            | n/a         |
| GD15 <sup>c</sup> | <i>M. myotis</i>      | Mauritius Mine, CZ                      | 50.3914, 12.8333 | 6.3.2010  | n/a         | HM584965            | n/a         |
| GD16 <sup>c</sup> | <i>M. mystacinus</i>  | Mauritius Mine, CZ                      | 50.3914, 12.8333 | 6.3.2010  | n/a         | (Basidiomycota)     | n/a         |
| GD17 <sup>c</sup> | <i>M. brandtii</i>    | Mauritius Mine, CZ                      | 50.3914, 12.8333 | 6.3.2010  | n/a         | neg.                | n/a         |

|                   |                          |                           |                  |           |     |                                |     |
|-------------------|--------------------------|---------------------------|------------------|-----------|-----|--------------------------------|-----|
| GD18 <sup>c</sup> | <i>Plecotus auritus</i>  | Mauritius Mine, CZ        | 50.3914, 12.8333 | 6.3.2010  | n/a | neg.<br>(uncultured<br>fungus) | n/a |
| GD4 <sup>c</sup>  | <i>Eptesicus nilsoni</i> | Wildbahner, CZ            | 50.3923, 12.8216 | 28.2.2010 | n/a | neg.                           | n/a |
| GD5 <sup>c</sup>  | <i>Plecotus sp.</i>      | Wildbahner, CZ            | 50.3923, 12.8216 | 28.2.2010 | n/a | neg.                           | n/a |
| GD33 <sup>c</sup> | <i>M. myotis</i>         | Schůdky Mine, Potůčky, CZ | 50.42, 12.75     |           | n/a | HM584976                       | n/a |
| GD34 <sup>c</sup> | <i>M. myotis</i>         | Ementál Mine, CZ          | 50.4328, 12.8339 | 9.2.2010  | n/a | HM584977                       | n/a |
| GD14 <sup>c</sup> | <i>M. mystacinus</i>     | Horní Perníková Mine, CZ  | 50.4358, 12.8603 | 26.3.2010 | n/a | HM584964                       | n/a |
| GD11 <sup>c</sup> | <i>M. myotis</i>         | Kohlreuter, CZ            | 50.4368, 12.8614 | 26.3.2010 | n/a | HM584962                       | n/a |
| GD12 <sup>c</sup> | <i>M. myotis</i>         | Kohlreuter, CZ            | 50.4368, 12.8614 | 26.3.2010 | n/a | HM584963                       | n/a |
| GD13 <sup>c</sup> | <i>M. mystacinus</i>     | Kohlreuter, CZ            | 50.4368, 12.8614 | 26.3.2010 | n/a | neg.                           | n/a |

c – cotton swab, n – nylon swab, t – adhesive tape sample; CZ – Czech Republic, SK – Slovakia; n/a – not available, *G.d.* – presence of conidia and mycelia with morphology consistent with *G. destructans*, neg. – negative for *G.d.*; taxa in parentheses – top blastn hits of DNA sequences other than *G. destructans*.
